# Supplementary material for: A Branch-and-Bound Algorithm for the Close-Enough Traveling Salesman Problem
Source: Atypon-hosted journal article supplement (doi:10.1287/ijoc.2016.0711), 2016-10-05
Supplement: ijoc.2016.0711-sm.pdf [file ijoc.2016.0711-sm.pdf]

Submitted to *INFORMS Journal on Computing*  
manuscript (Please, provide the manuscript number!)

Authors are encouraged to submit new papers to INFORMS journals by means of a style file template, which includes the journal title. However, use of a template does not certify that the paper has been accepted for publication in the named journal. INFORMS journal templates are for the exclusive purpose of submitting to an INFORMS journal and should not be used to distribute the papers in print or online or to submit the papers to another publication.

## Online Supplement to “A Branch-and-Bound Algorithm for the Close-Enough Traveling Salesman Problem”

Walton Pereira Coutinho

School of Mathematics — University of Southampton  
Southampton SO17 1BJ, UK  
w.p.coutinho@soton.ac.uk

Roberto Quirino do Nascimento

Departamento de Computação Científica, Centro de Informática — Universidade Federal da Paraíba  
Unidade Lynaldo Cavalcanti de Albuquerque  
Av. dos Escoteiros, S/N Distrito Industrial de Mangabeira,  
58055-000 , João Pessoa - PB, Brazil  
roberto@ci.ufpb.br

Artur Alves Pessoa

Departamento de Engenharia de Produção — Universidade Federal Fluminense  
Rua Passo da Pátria, 156, Bloco E, 4 andar, São Domingos, 24210-240, Niterói - RJ, Brazil  
artur@producao.uff.br

Anand Subramanian

Departamento de Engenharia de Produção, Centro de Tecnologia — Universidade Federal da Paraíba  
Campus I, Bloco G, Cidade Universitária, 58051-970, João Pessoa - PB, Brazil  
anand@ct.ufpb.br

In this online supplement, we present detailed computational results of the branch-and-bound algorithm on the instances proposed by Behdani and Smith (2014).

*Key words:* close-enough traveling salesman problem; branch-and-bound; second order cone programming

---

## Detailed results for the instances of Behdani and Smith (2014)

Table 1 Results for  $r = 0.25$ 

| Instance   | Size | Opt.   | Tree Size | Time | Instance    | Size | Opt.   | Tree Size | Time |
|------------|------|--------|-----------|------|-------------|------|--------|-----------|------|
| CETSP-6-0  | 7    | 28.051 | 33        | 0.04 | CETSP-10-0  | 11   | 37.648 | 87        | 0.11 |
| CETSP-6-1  | 7    | 33.862 | 33        | 0.04 | CETSP-10-1  | 11   | 37.380 | 81        | 0.10 |
| CETSP-6-2  | 7    | 27.641 | 21        | 0.02 | CETSP-10-2  | 11   | 46.101 | 95        | 0.12 |
| CETSP-6-3  | 7    | 25.392 | 33        | 0.03 | CETSP-10-3  | 11   | 31.958 | 80        | 0.10 |
| CETSP-6-4  | 7    | 36.758 | 21        | 0.02 | CETSP-10-4  | 11   | 35.161 | 80        | 0.10 |
| CETSP-6-5  | 7    | 22.151 | 16        | 0.02 | CETSP-10-5  | 11   | 36.031 | 96        | 0.12 |
| CETSP-6-6  | 7    | 27.903 | 27        | 0.03 | CETSP-10-6  | 11   | 36.469 | 84        | 0.09 |
| CETSP-6-7  | 7    | 34.763 | 16        | 0.02 | CETSP-10-7  | 11   | 35.346 | 61        | 0.07 |
| CETSP-6-8  | 7    | 24.165 | 33        | 0.04 | CETSP-10-8  | 11   | 34.333 | 46        | 0.06 |
| CETSP-6-9  | 7    | 28.473 | 27        | 0.03 | CETSP-10-9  | 11   | 30.707 | 79        | 0.10 |
| CETSP-6-10 | 7    | 34.718 | 21        | 0.02 | CETSP-10-10 | 11   | 35.215 | 77        | 0.10 |
| CETSP-6-11 | 7    | 31.599 | 27        | 0.03 | CETSP-10-11 | 11   | 31.131 | 68        | 0.08 |
| CETSP-6-12 | 7    | 33.352 | 33        | 0.04 | CETSP-10-12 | 11   | 36.423 | 99        | 0.13 |
| CETSP-6-13 | 7    | 26.710 | 21        | 0.02 | CETSP-10-13 | 11   | 36.101 | 55        | 0.07 |
| CETSP-6-14 | 7    | 28.679 | 33        | 0.04 | CETSP-10-14 | 11   | 34.273 | 85        | 0.11 |
| CETSP-6-15 | 7    | 34.118 | 16        | 0.02 | CETSP-10-15 | 11   | 32.977 | 33        | 0.04 |
| CETSP-6-16 | 7    | 23.635 | 33        | 0.03 | CETSP-10-16 | 11   | 31.408 | 63        | 0.08 |
| CETSP-6-17 | 7    | 22.834 | 16        | 0.02 | CETSP-10-17 | 11   | 36.172 | 101       | 0.13 |
| CETSP-6-18 | 7    | 28.359 | 21        | 0.03 | CETSP-10-18 | 11   | 39.150 | 33        | 0.04 |
| CETSP-6-19 | 7    | 33.198 | 21        | 0.02 | CETSP-10-19 | 11   | 40.899 | 110       | 0.14 |
| CETSP-6-20 | 7    | 34.851 | 32        | 0.04 | CETSP-10-20 | 11   | 33.825 | 96        | 0.12 |
| CETSP-6-21 | 7    | 32.084 | 33        | 0.04 | CETSP-10-21 | 11   | 41.348 | 62        | 0.08 |
| CETSP-6-22 | 7    | 27.746 | 21        | 0.02 | CETSP-10-22 | 11   | 38.272 | 114       | 0.15 |
| CETSP-6-23 | 7    | 29.058 | 33        | 0.04 | CETSP-10-23 | 11   | 35.299 | 68        | 0.08 |
| CETSP-6-24 | 7    | 33.151 | 21        | 0.02 | CETSP-10-24 | 11   | 40.596 | 194       | 0.24 |
| CETSP-6-25 | 7    | 30.280 | 21        | 0.02 | CETSP-10-25 | 11   | 37.139 | 88        | 0.11 |
| CETSP-6-26 | 7    | 30.264 | 33        | 0.04 | CETSP-10-26 | 11   | 39.277 | 211       | 0.26 |
| CETSP-6-27 | 7    | 30.783 | 32        | 0.04 | CETSP-10-27 | 11   | 32.420 | 99        | 0.12 |
| CETSP-6-28 | 7    | 35.940 | 21        | 0.02 | CETSP-10-28 | 11   | 37.996 | 81        | 0.10 |
| CETSP-6-29 | 7    | 41.384 | 33        | 0.03 | CETSP-10-29 | 11   | 35.405 | 63        | 0.07 |
| CETSP-8-0  | 9    | 32.069 | 63        | 0.08 | CETSP-12-0  | 13   | 39.338 | 142       | 0.20 |
| CETSP-8-1  | 9    | 35.697 | 52        | 0.06 | CETSP-12-1  | 13   | 36.202 | 127       | 0.18 |
| CETSP-8-2  | 9    | 25.439 | 27        | 0.03 | CETSP-12-2  | 13   | 47.604 | 124       | 0.16 |
| CETSP-8-3  | 9    | 37.387 | 63        | 0.08 | CETSP-12-3  | 13   | 35.264 | 122       | 0.18 |
| CETSP-8-4  | 9    | 29.294 | 47        | 0.06 | CETSP-12-4  | 13   | 35.417 | 101       | 0.13 |
| CETSP-8-5  | 9    | 33.514 | 47        | 0.06 | CETSP-12-5  | 13   | 41.358 | 337       | 0.46 |
| CETSP-8-6  | 9    | 25.672 | 61        | 0.07 | CETSP-12-6  | 13   | 37.860 | 101       | 0.14 |
| CETSP-8-7  | 9    | 30.022 | 39        | 0.04 | CETSP-12-7  | 13   | 36.973 | 61        | 0.08 |
| CETSP-8-8  | 9    | 33.499 | 47        | 0.06 | CETSP-12-8  | 13   | 40.990 | 156       | 0.21 |
| CETSP-8-9  | 9    | 38.936 | 47        | 0.06 | CETSP-12-9  | 13   | 34.931 | 95        | 0.12 |
| CETSP-8-10 | 9    | 30.246 | 21        | 0.02 | CETSP-12-10 | 13   | 42.983 | 124       | 0.16 |
| CETSP-8-11 | 9    | 29.826 | 47        | 0.06 | CETSP-12-11 | 13   | 37.885 | 101       | 0.13 |
| CETSP-8-12 | 9    | 33.321 | 33        | 0.04 | CETSP-12-12 | 13   | 34.975 | 101       | 0.13 |
| CETSP-8-13 | 9    | 30.726 | 45        | 0.05 | CETSP-12-13 | 13   | 39.387 | 166       | 0.22 |
| CETSP-8-14 | 9    | 36.420 | 68        | 0.08 | CETSP-12-14 | 13   | 35.921 | 119       | 0.16 |
| CETSP-8-15 | 9    | 32.921 | 59        | 0.07 | CETSP-12-15 | 13   | 42.698 | 72        | 0.09 |
| CETSP-8-16 | 9    | 36.022 | 47        | 0.06 | CETSP-12-16 | 13   | 40.948 | 160       | 0.23 |
| CETSP-8-17 | 9    | 31.365 | 40        | 0.05 | CETSP-12-17 | 13   | 37.094 | 145       | 0.21 |
| CETSP-8-18 | 9    | 32.128 | 33        | 0.04 | CETSP-12-18 | 13   | 40.735 | 122       | 0.17 |
| CETSP-8-19 | 9    | 35.199 | 62        | 0.08 | CETSP-12-19 | 13   | 40.487 | 177       | 0.24 |
| CETSP-8-20 | 9    | 30.768 | 47        | 0.06 | CETSP-12-20 | 13   | 35.198 | 147       | 0.21 |
| CETSP-8-21 | 9    | 33.503 | 55        | 0.07 | CETSP-12-21 | 13   | 41.530 | 241       | 0.33 |
| CETSP-8-22 | 9    | 41.536 | 63        | 0.07 | CETSP-12-22 | 13   | 39.740 | 270       | 0.37 |
| CETSP-8-23 | 9    | 34.153 | 63        | 0.08 | CETSP-12-23 | 13   | 35.212 | 99        | 0.13 |
| CETSP-8-24 | 9    | 33.788 | 63        | 0.08 | CETSP-12-24 | 13   | 38.687 | 145       | 0.19 |
| CETSP-8-25 | 9    | 39.793 | 68        | 0.08 | CETSP-12-25 | 13   | 40.777 | 159       | 0.21 |
| CETSP-8-26 | 9    | 37.755 | 55        | 0.06 | CETSP-12-26 | 13   | 34.894 | 122       | 0.18 |
| CETSP-8-27 | 9    | 35.772 | 68        | 0.09 | CETSP-12-27 | 13   | 36.297 | 138       | 0.20 |
| CETSP-8-28 | 9    | 31.315 | 52        | 0.07 | CETSP-12-28 | 13   | 37.256 | 114       | 0.15 |
| CETSP-8-29 | 9    | 34.974 | 47        | 0.05 | CETSP-12-29 | 13   | 37.005 | 79        | 0.10 |

Table 2 Results for  $r = 0.25$  (Continued)

| Instance    | Size | Opt.   | Tree Size | Time | Instance    | Size | Opt.   | Tree Size | Time |
|-------------|------|--------|-----------|------|-------------|------|--------|-----------|------|
| CETSP-14-0  | 15   | 40.445 | 209       | 0.32 | CETSP-18-0  | 19   | 41.322 | 362       | 0.60 |
| CETSP-14-1  | 15   | 41.751 | 231       | 0.31 | CETSP-18-1  | 19   | 48.079 | 250       | 0.35 |
| CETSP-14-2  | 15   | 40.154 | 388       | 0.62 | CETSP-18-2  | 19   | 41.234 | 445       | 0.72 |
| CETSP-14-3  | 15   | 36.239 | 123       | 0.18 | CETSP-18-3  | 19   | 44.681 | 1259      | 1.94 |
| CETSP-14-4  | 15   | 41.032 | 454       | 0.57 | CETSP-18-4  | 19   | 44.842 | 238       | 0.40 |
| CETSP-14-5  | 15   | 36.336 | 166       | 0.25 | CETSP-18-5  | 19   | 40.794 | 211       | 0.33 |
| CETSP-14-6  | 15   | 36.549 | 93        | 0.12 | CETSP-18-6  | 19   | 40.294 | 798       | 1.10 |
| CETSP-14-7  | 15   | 42.216 | 210       | 0.29 | CETSP-18-7  | 19   | 38.894 | 173       | 0.28 |
| CETSP-14-8  | 15   | 37.416 | 168       | 0.23 | CETSP-18-8  | 19   | 35.898 | 140       | 0.19 |
| CETSP-14-9  | 15   | 37.945 | 99        | 0.13 | CETSP-18-9  | 19   | 37.798 | 264       | 0.44 |
| CETSP-14-10 | 15   | 37.478 | 170       | 0.25 | CETSP-18-10 | 19   | 44.962 | 295       | 0.46 |
| CETSP-14-11 | 15   | 39.180 | 200       | 0.28 | CETSP-18-11 | 19   | 50.117 | 722       | 1.18 |
| CETSP-14-12 | 15   | 37.982 | 214       | 0.33 | CETSP-18-12 | 19   | 44.023 | 354       | 0.55 |
| CETSP-14-13 | 15   | 44.277 | 137       | 0.19 | CETSP-18-13 | 19   | 43.899 | 507       | 0.78 |
| CETSP-14-14 | 15   | 43.238 | 210       | 0.33 | CETSP-18-14 | 19   | 45.635 | 1331      | 2.05 |
| CETSP-14-15 | 15   | 41.829 | 165       | 0.26 | CETSP-18-15 | 19   | 42.191 | 475       | 0.69 |
| CETSP-14-16 | 15   | 45.761 | 226       | 0.30 | CETSP-18-16 | 19   | 45.936 | 907       | 1.36 |
| CETSP-14-17 | 15   | 36.990 | 461       | 0.64 | CETSP-18-17 | 19   | 45.855 | 1068      | 1.66 |
| CETSP-14-18 | 15   | 42.912 | 563       | 0.79 | CETSP-18-18 | 19   | 46.274 | 319       | 0.48 |
| CETSP-14-19 | 15   | 40.263 | 421       | 0.60 | CETSP-18-19 | 19   | 43.434 | 290       | 0.44 |
| CETSP-14-20 | 15   | 36.329 | 147       | 0.20 | CETSP-18-20 | 19   | 43.548 | 270       | 0.38 |
| CETSP-14-21 | 15   | 38.699 | 146       | 0.19 | CETSP-18-21 | 19   | 38.735 | 1246      | 1.96 |
| CETSP-14-22 | 15   | 42.718 | 307       | 0.42 | CETSP-18-22 | 19   | 40.608 | 291       | 0.40 |
| CETSP-14-23 | 15   | 40.349 | 102       | 0.14 | CETSP-18-23 | 19   | 41.802 | 284       | 0.39 |
| CETSP-14-24 | 15   | 41.446 | 137       | 0.18 | CETSP-18-24 | 19   | 47.271 | 1011      | 1.66 |
| CETSP-14-25 | 15   | 37.190 | 100       | 0.14 | CETSP-18-25 | 19   | 45.342 | 272       | 0.44 |
| CETSP-14-26 | 15   | 43.857 | 192       | 0.28 | CETSP-18-26 | 19   | 47.429 | 404       | 0.65 |
| CETSP-14-27 | 15   | 38.837 | 215       | 0.30 | CETSP-18-27 | 19   | 43.228 | 381       | 0.65 |
| CETSP-14-28 | 15   | 39.600 | 186       | 0.22 | CETSP-18-28 | 19   | 42.901 | 684       | 1.11 |
| CETSP-14-29 | 15   | 35.514 | 118       | 0.17 | CETSP-18-29 | 19   | 46.983 | 1066      | 1.53 |
| CETSP-16-0  | 17   | 40.875 | 261       | 0.40 | CETSP-20-0  | 21   | 41.663 | 480       | 0.84 |
| CETSP-16-1  | 17   | 46.802 | 140       | 0.20 | CETSP-20-1  | 21   | 48.582 | 808       | 1.30 |
| CETSP-16-2  | 17   | 38.612 | 286       | 0.44 | CETSP-20-2  | 21   | 39.706 | 318       | 0.56 |
| CETSP-16-3  | 17   | 43.401 | 213       | 0.32 | CETSP-20-3  | 21   | 52.071 | 3147      | 5.32 |
| CETSP-16-4  | 17   | 39.596 | 344       | 0.57 | CETSP-20-4  | 21   | 42.449 | 541       | 0.88 |
| CETSP-16-5  | 17   | 38.984 | 186       | 0.27 | CETSP-20-5  | 21   | 46.030 | 479       | 0.72 |
| CETSP-16-6  | 17   | 43.818 | 432       | 0.65 | CETSP-20-6  | 21   | 47.124 | 996       | 1.52 |
| CETSP-16-7  | 17   | 40.548 | 588       | 0.83 | CETSP-20-7  | 21   | 42.608 | 313       | 0.54 |
| CETSP-16-8  | 17   | 39.123 | 196       | 0.31 | CETSP-20-8  | 21   | 41.654 | 712       | 1.12 |
| CETSP-16-9  | 17   | 35.423 | 170       | 0.22 | CETSP-20-9  | 21   | 46.386 | 419       | 0.70 |
| CETSP-16-10 | 17   | 37.432 | 236       | 0.36 | CETSP-20-10 | 21   | 46.776 | 1393      | 2.30 |
| CETSP-16-11 | 17   | 41.860 | 336       | 0.54 | CETSP-20-11 | 21   | 46.903 | 497       | 0.86 |
| CETSP-16-12 | 17   | 52.277 | 374       | 0.55 | CETSP-20-12 | 21   | 43.134 | 1173      | 2.01 |
| CETSP-16-13 | 17   | 42.703 | 198       | 0.32 | CETSP-20-13 | 21   | 45.156 | 1678      | 2.77 |
| CETSP-16-14 | 17   | 46.434 | 288       | 0.39 | CETSP-20-14 | 21   | 43.382 | 930       | 1.41 |
| CETSP-16-15 | 17   | 41.872 | 1517      | 2.47 | CETSP-20-15 | 21   | 43.001 | 541       | 0.88 |
| CETSP-16-16 | 17   | 41.846 | 831       | 1.30 | CETSP-20-16 | 21   | 46.982 | 917       | 1.45 |
| CETSP-16-17 | 17   | 39.106 | 404       | 0.64 | CETSP-20-17 | 21   | 44.101 | 356       | 0.54 |
| CETSP-16-18 | 17   | 45.459 | 962       | 1.35 | CETSP-20-18 | 21   | 46.090 | 397       | 0.66 |
| CETSP-16-19 | 17   | 43.594 | 546       | 0.78 | CETSP-20-19 | 21   | 44.669 | 3832      | 6.12 |
| CETSP-16-20 | 17   | 46.199 | 340       | 0.48 | CETSP-20-20 | 21   | 47.551 | 2155      | 3.52 |
| CETSP-16-21 | 17   | 41.393 | 171       | 0.25 | CETSP-20-21 | 21   | 43.062 | 392       | 0.62 |
| CETSP-16-22 | 17   | 38.608 | 165       | 0.26 | CETSP-20-22 | 21   | 46.051 | 740       | 1.22 |
| CETSP-16-23 | 17   | 43.711 | 344       | 0.55 | CETSP-20-23 | 21   | 48.816 | 2133      | 3.60 |
| CETSP-16-24 | 17   | 40.266 | 2007      | 3.00 | CETSP-20-24 | 21   | 47.472 | 413       | 0.73 |
| CETSP-16-25 | 17   | 40.601 | 481       | 0.76 | CETSP-20-25 | 21   | 46.423 | 1691      | 2.65 |
| CETSP-16-26 | 17   | 41.155 | 247       | 0.36 | CETSP-20-26 | 21   | 48.101 | 955       | 1.44 |
| CETSP-16-27 | 17   | 45.308 | 320       | 0.51 | CETSP-20-27 | 21   | 45.339 | 472       | 0.75 |
| CETSP-16-28 | 17   | 44.838 | 306       | 0.44 | CETSP-20-28 | 21   | 48.392 | 1365      | 2.29 |
| CETSP-16-29 | 17   | 43.588 | 397       | 0.66 | CETSP-20-29 | 21   | 42.662 | 245       | 0.37 |

**Table 3** Results for  $r = 0.50$ 

| Instance   | Size | Opt.   | Tree Size | Time | Instance    | Size | Opt.   | Tree Size | Time |
|------------|------|--------|-----------|------|-------------|------|--------|-----------|------|
| CETSP-6-0  | 7    | 27.164 | 21        | 0.02 | CETSP-10-0  | 11   | 36.226 | 63        | 0.08 |
| CETSP-6-1  | 7    | 32.438 | 16        | 0.02 | CETSP-10-1  | 11   | 36.068 | 55        | 0.08 |
| CETSP-6-2  | 7    | 26.227 | 16        | 0.02 | CETSP-10-2  | 11   | 43.585 | 88        | 0.11 |
| CETSP-6-3  | 7    | 23.935 | 21        | 0.02 | CETSP-10-3  | 11   | 29.474 | 62        | 0.08 |
| CETSP-6-4  | 7    | 35.406 | 21        | 0.02 | CETSP-10-4  | 11   | 32.983 | 63        | 0.08 |
| CETSP-6-5  | 7    | 20.845 | 21        | 0.02 | CETSP-10-5  | 11   | 33.773 | 81        | 0.11 |
| CETSP-6-6  | 7    | 26.733 | 11        | 0.01 | CETSP-10-6  | 11   | 33.972 | 60        | 0.07 |
| CETSP-6-7  | 7    | 33.762 | 7         | 0.01 | CETSP-10-7  | 11   | 33.713 | 45        | 0.06 |
| CETSP-6-8  | 7    | 23.139 | 16        | 0.02 | CETSP-10-8  | 11   | 32.692 | 47        | 0.06 |
| CETSP-6-9  | 7    | 26.858 | 21        | 0.02 | CETSP-10-9  | 11   | 29.165 | 79        | 0.10 |
| CETSP-6-10 | 7    | 33.643 | 3         | 0.00 | CETSP-10-10 | 11   | 33.006 | 63        | 0.08 |
| CETSP-6-11 | 7    | 30.132 | 27        | 0.03 | CETSP-10-11 | 11   | 29.322 | 63        | 0.08 |
| CETSP-6-12 | 7    | 31.772 | 21        | 0.02 | CETSP-10-12 | 11   | 34.276 | 101       | 0.14 |
| CETSP-6-13 | 7    | 25.305 | 21        | 0.02 | CETSP-10-13 | 11   | 34.601 | 33        | 0.04 |
| CETSP-6-14 | 7    | 27.151 | 16        | 0.02 | CETSP-10-14 | 11   | 32.403 | 33        | 0.04 |
| CETSP-6-15 | 7    | 33.025 | 16        | 0.02 | CETSP-10-15 | 11   | 31.671 | 21        | 0.02 |
| CETSP-6-16 | 7    | 22.020 | 16        | 0.02 | CETSP-10-16 | 11   | 29.763 | 47        | 0.06 |
| CETSP-6-17 | 7    | 21.703 | 11        | 0.01 | CETSP-10-17 | 11   | 34.073 | 63        | 0.08 |
| CETSP-6-18 | 7    | 27.068 | 21        | 0.02 | CETSP-10-18 | 11   | 37.721 | 33        | 0.04 |
| CETSP-6-19 | 7    | 32.157 | 21        | 0.02 | CETSP-10-19 | 11   | 38.688 | 77        | 0.10 |
| CETSP-6-20 | 7    | 33.252 | 32        | 0.04 | CETSP-10-20 | 11   | 32.356 | 79        | 0.11 |
| CETSP-6-21 | 7    | 30.580 | 33        | 0.04 | CETSP-10-21 | 11   | 39.490 | 46        | 0.06 |
| CETSP-6-22 | 7    | 26.557 | 21        | 0.02 | CETSP-10-22 | 11   | 36.241 | 63        | 0.08 |
| CETSP-6-23 | 7    | 28.093 | 21        | 0.02 | CETSP-10-23 | 11   | 33.579 | 53        | 0.06 |
| CETSP-6-24 | 7    | 31.733 | 21        | 0.02 | CETSP-10-24 | 11   | 38.026 | 141       | 0.18 |
| CETSP-6-25 | 7    | 29.335 | 7         | 0.01 | CETSP-10-25 | 11   | 35.192 | 63        | 0.08 |
| CETSP-6-26 | 7    | 28.663 | 21        | 0.02 | CETSP-10-26 | 11   | 36.788 | 161       | 0.22 |
| CETSP-6-27 | 7    | 28.979 | 32        | 0.03 | CETSP-10-27 | 11   | 30.414 | 80        | 0.10 |
| CETSP-6-28 | 7    | 34.603 | 11        | 0.01 | CETSP-10-28 | 11   | 36.087 | 64        | 0.08 |
| CETSP-6-29 | 7    | 39.621 | 21        | 0.02 | CETSP-10-29 | 11   | 33.712 | 63        | 0.08 |
| CETSP-8-0  | 9    | 30.944 | 16        | 0.02 | CETSP-12-0  | 13   | 37.472 | 120       | 0.17 |
| CETSP-8-1  | 9    | 34.073 | 47        | 0.06 | CETSP-12-1  | 13   | 34.105 | 87        | 0.12 |
| CETSP-8-2  | 9    | 24.006 | 33        | 0.04 | CETSP-12-2  | 13   | 45.216 | 96        | 0.13 |
| CETSP-8-3  | 9    | 35.591 | 47        | 0.06 | CETSP-12-3  | 13   | 33.168 | 72        | 0.10 |
| CETSP-8-4  | 9    | 27.767 | 47        | 0.06 | CETSP-12-4  | 13   | 33.247 | 63        | 0.08 |
| CETSP-8-5  | 9    | 31.987 | 27        | 0.03 | CETSP-12-5  | 13   | 38.045 | 207       | 0.29 |
| CETSP-8-6  | 9    | 24.419 | 39        | 0.05 | CETSP-12-6  | 13   | 36.152 | 72        | 0.10 |
| CETSP-8-7  | 9    | 27.828 | 40        | 0.06 | CETSP-12-7  | 13   | 35.054 | 61        | 0.08 |
| CETSP-8-8  | 9    | 31.971 | 21        | 0.03 | CETSP-12-8  | 13   | 38.392 | 135       | 0.19 |
| CETSP-8-9  | 9    | 37.380 | 33        | 0.04 | CETSP-12-9  | 13   | 32.537 | 72        | 0.10 |
| CETSP-8-10 | 9    | 28.967 | 21        | 0.02 | CETSP-12-10 | 13   | 40.701 | 109       | 0.15 |
| CETSP-8-11 | 9    | 28.288 | 47        | 0.06 | CETSP-12-11 | 13   | 35.910 | 63        | 0.08 |
| CETSP-8-12 | 9    | 31.521 | 33        | 0.04 | CETSP-12-12 | 13   | 33.445 | 51        | 0.06 |
| CETSP-8-13 | 9    | 28.872 | 33        | 0.04 | CETSP-12-13 | 13   | 36.958 | 100       | 0.13 |
| CETSP-8-14 | 9    | 34.467 | 68        | 0.08 | CETSP-12-14 | 13   | 33.757 | 80        | 0.10 |
| CETSP-8-15 | 9    | 31.669 | 47        | 0.06 | CETSP-12-15 | 13   | 40.832 | 47        | 0.06 |
| CETSP-8-16 | 9    | 34.394 | 33        | 0.04 | CETSP-12-16 | 13   | 38.250 | 101       | 0.14 |
| CETSP-8-17 | 9    | 30.064 | 21        | 0.02 | CETSP-12-17 | 13   | 35.078 | 81        | 0.11 |
| CETSP-8-18 | 9    | 30.813 | 33        | 0.04 | CETSP-12-18 | 13   | 38.755 | 80        | 0.10 |
| CETSP-8-19 | 9    | 33.528 | 63        | 0.08 | CETSP-12-19 | 13   | 38.255 | 126       | 0.18 |
| CETSP-8-20 | 9    | 29.178 | 33        | 0.04 | CETSP-12-20 | 13   | 32.621 | 135       | 0.20 |
| CETSP-8-21 | 9    | 31.785 | 33        | 0.04 | CETSP-12-21 | 13   | 38.628 | 101       | 0.14 |
| CETSP-8-22 | 9    | 40.239 | 16        | 0.01 | CETSP-12-22 | 13   | 36.827 | 147       | 0.20 |
| CETSP-8-23 | 9    | 32.256 | 47        | 0.05 | CETSP-12-23 | 13   | 32.797 | 79        | 0.10 |
| CETSP-8-24 | 9    | 32.332 | 47        | 0.06 | CETSP-12-24 | 13   | 36.264 | 95        | 0.13 |
| CETSP-8-25 | 9    | 38.023 | 46        | 0.06 | CETSP-12-25 | 13   | 38.079 | 79        | 0.10 |
| CETSP-8-26 | 9    | 35.871 | 47        | 0.05 | CETSP-12-26 | 13   | 33.076 | 79        | 0.11 |
| CETSP-8-27 | 9    | 34.183 | 52        | 0.06 | CETSP-12-27 | 13   | 34.343 | 89        | 0.12 |
| CETSP-8-28 | 9    | 29.566 | 47        | 0.06 | CETSP-12-28 | 13   | 35.105 | 77        | 0.10 |
| CETSP-8-29 | 9    | 33.382 | 47        | 0.06 | CETSP-12-29 | 13   | 35.301 | 60        | 0.08 |

**Table 4 Results for  $r = 0.50$  (Continued)**

| Instance    | Size | Opt.   | Tree Size | Time | Instance    | Size | Opt.   | Tree Size | Time |
|-------------|------|--------|-----------|------|-------------|------|--------|-----------|------|
| CETSP-14-0  | 15   | 38.144 | 145       | 0.20 | CETSP-18-0  | 19   | 38.647 | 203       | 0.34 |
| CETSP-14-1  | 15   | 38.897 | 102       | 0.14 | CETSP-18-1  | 19   | 44.777 | 167       | 0.27 |
| CETSP-14-2  | 15   | 36.873 | 224       | 0.36 | CETSP-18-2  | 19   | 38.075 | 274       | 0.42 |
| CETSP-14-3  | 15   | 34.153 | 81        | 0.11 | CETSP-18-3  | 19   | 41.214 | 793       | 1.30 |
| CETSP-14-4  | 15   | 37.938 | 266       | 0.35 | CETSP-18-4  | 19   | 41.760 | 197       | 0.33 |
| CETSP-14-5  | 15   | 34.309 | 80        | 0.11 | CETSP-18-5  | 19   | 38.092 | 150       | 0.23 |
| CETSP-14-6  | 15   | 34.163 | 94        | 0.13 | CETSP-18-6  | 19   | 37.199 | 661       | 0.97 |
| CETSP-14-7  | 15   | 39.126 | 138       | 0.19 | CETSP-18-7  | 19   | 36.395 | 147       | 0.23 |
| CETSP-14-8  | 15   | 34.576 | 155       | 0.22 | CETSP-18-8  | 19   | 33.670 | 109       | 0.16 |
| CETSP-14-9  | 15   | 36.029 | 101       | 0.14 | CETSP-18-9  | 19   | 34.848 | 152       | 0.23 |
| CETSP-14-10 | 15   | 34.984 | 124       | 0.18 | CETSP-18-10 | 19   | 41.544 | 145       | 0.22 |
| CETSP-14-11 | 15   | 36.633 | 98        | 0.14 | CETSP-18-11 | 19   | 46.029 | 324       | 0.53 |
| CETSP-14-12 | 15   | 35.211 | 109       | 0.16 | CETSP-18-12 | 19   | 40.859 | 181       | 0.27 |
| CETSP-14-13 | 15   | 42.163 | 78        | 0.10 | CETSP-18-13 | 19   | 40.881 | 424       | 0.71 |
| CETSP-14-14 | 15   | 39.660 | 172       | 0.27 | CETSP-18-14 | 19   | 42.097 | 1089      | 1.71 |
| CETSP-14-15 | 15   | 38.956 | 120       | 0.18 | CETSP-18-15 | 19   | 39.184 | 342       | 0.53 |
| CETSP-14-16 | 15   | 43.036 | 129       | 0.18 | CETSP-18-16 | 19   | 42.831 | 854       | 1.40 |
| CETSP-14-17 | 15   | 34.118 | 361       | 0.51 | CETSP-18-17 | 19   | 41.837 | 408       | 0.64 |
| CETSP-14-18 | 15   | 39.138 | 193       | 0.28 | CETSP-18-18 | 19   | 43.036 | 124       | 0.18 |
| CETSP-14-19 | 15   | 37.169 | 232       | 0.33 | CETSP-18-19 | 19   | 40.200 | 191       | 0.30 |
| CETSP-14-20 | 15   | 33.705 | 129       | 0.19 | CETSP-18-20 | 19   | 40.761 | 218       | 0.33 |
| CETSP-14-21 | 15   | 36.001 | 114       | 0.16 | CETSP-18-21 | 19   | 35.102 | 665       | 1.18 |
| CETSP-14-22 | 15   | 40.335 | 293       | 0.41 | CETSP-18-22 | 19   | 37.855 | 208       | 0.29 |
| CETSP-14-23 | 15   | 37.776 | 96        | 0.14 | CETSP-18-23 | 19   | 38.742 | 152       | 0.22 |
| CETSP-14-24 | 15   | 38.901 | 100       | 0.14 | CETSP-18-24 | 19   | 43.602 | 495       | 0.82 |
| CETSP-14-25 | 15   | 35.315 | 80        | 0.11 | CETSP-18-25 | 19   | 42.263 | 146       | 0.22 |
| CETSP-14-26 | 15   | 41.050 | 142       | 0.20 | CETSP-18-26 | 19   | 44.130 | 118       | 0.18 |
| CETSP-14-27 | 15   | 35.670 | 96        | 0.14 | CETSP-18-27 | 19   | 39.536 | 195       | 0.32 |
| CETSP-14-28 | 15   | 37.160 | 178       | 0.23 | CETSP-18-28 | 19   | 38.639 | 293       | 0.50 |
| CETSP-14-29 | 15   | 33.382 | 81        | 0.11 | CETSP-18-29 | 19   | 43.128 | 515       | 0.73 |
| CETSP-16-0  | 17   | 38.275 | 201       | 0.33 | CETSP-20-0  | 21   | 38.739 | 258       | 0.46 |
| CETSP-16-1  | 17   | 43.809 | 122       | 0.19 | CETSP-20-1  | 21   | 45.003 | 327       | 0.52 |
| CETSP-16-2  | 17   | 35.349 | 172       | 0.26 | CETSP-20-2  | 21   | 35.925 | 272       | 0.50 |
| CETSP-16-3  | 17   | 40.967 | 145       | 0.22 | CETSP-20-3  | 21   | 47.701 | 1063      | 1.74 |
| CETSP-16-4  | 17   | 36.532 | 185       | 0.30 | CETSP-20-4  | 21   | 38.803 | 334       | 0.58 |
| CETSP-16-5  | 17   | 36.325 | 127       | 0.18 | CETSP-20-5  | 21   | 42.775 | 436       | 0.70 |
| CETSP-16-6  | 17   | 40.611 | 276       | 0.41 | CETSP-20-6  | 21   | 43.403 | 452       | 0.70 |
| CETSP-16-7  | 17   | 36.929 | 389       | 0.58 | CETSP-20-7  | 21   | 39.752 | 257       | 0.47 |
| CETSP-16-8  | 17   | 36.339 | 169       | 0.26 | CETSP-20-8  | 21   | 38.485 | 287       | 0.44 |
| CETSP-16-9  | 17   | 33.331 | 114       | 0.15 | CETSP-20-9  | 21   | 42.688 | 193       | 0.31 |
| CETSP-16-10 | 17   | 34.640 | 135       | 0.21 | CETSP-20-10 | 21   | 42.292 | 424       | 0.72 |
| CETSP-16-11 | 17   | 38.621 | 140       | 0.20 | CETSP-20-11 | 21   | 43.559 | 236       | 0.36 |
| CETSP-16-12 | 17   | 48.726 | 149       | 0.22 | CETSP-20-12 | 21   | 39.616 | 628       | 1.10 |
| CETSP-16-13 | 17   | 40.540 | 111       | 0.16 | CETSP-20-13 | 21   | 40.837 | 550       | 0.91 |
| CETSP-16-14 | 17   | 43.490 | 174       | 0.22 | CETSP-20-14 | 21   | 39.776 | 393       | 0.58 |
| CETSP-16-15 | 17   | 38.138 | 632       | 0.95 | CETSP-20-15 | 21   | 39.736 | 365       | 0.59 |
| CETSP-16-16 | 17   | 38.114 | 317       | 0.49 | CETSP-20-16 | 21   | 43.453 | 483       | 0.75 |
| CETSP-16-17 | 17   | 35.580 | 216       | 0.37 | CETSP-20-17 | 21   | 40.772 | 208       | 0.31 |
| CETSP-16-18 | 17   | 41.865 | 426       | 0.61 | CETSP-20-18 | 21   | 42.364 | 232       | 0.40 |
| CETSP-16-19 | 17   | 40.260 | 255       | 0.36 | CETSP-20-19 | 21   | 40.147 | 1180      | 1.91 |
| CETSP-16-20 | 17   | 43.267 | 182       | 0.26 | CETSP-20-20 | 21   | 43.641 | 718       | 1.18 |
| CETSP-16-21 | 17   | 38.757 | 97        | 0.13 | CETSP-20-21 | 21   | 40.437 | 223       | 0.33 |
| CETSP-16-22 | 17   | 36.616 | 80        | 0.12 | CETSP-20-22 | 21   | 42.471 | 468       | 0.80 |
| CETSP-16-23 | 17   | 40.556 | 206       | 0.32 | CETSP-20-23 | 21   | 44.577 | 709       | 1.23 |
| CETSP-16-24 | 17   | 36.057 | 724       | 1.08 | CETSP-20-24 | 21   | 44.272 | 281       | 0.52 |
| CETSP-16-25 | 17   | 37.188 | 166       | 0.27 | CETSP-20-25 | 21   | 42.111 | 722       | 1.14 |
| CETSP-16-26 | 17   | 38.817 | 186       | 0.26 | CETSP-20-26 | 21   | 44.167 | 417       | 0.64 |
| CETSP-16-27 | 17   | 41.874 | 184       | 0.29 | CETSP-20-27 | 21   | 41.926 | 324       | 0.55 |
| CETSP-16-28 | 17   | 41.669 | 177       | 0.26 | CETSP-20-28 | 21   | 44.357 | 474       | 0.80 |
| CETSP-16-29 | 17   | 40.348 | 209       | 0.35 | CETSP-20-29 | 21   | 39.296 | 200       | 0.32 |

Table 5 Results for  $r = 1.0$ 

| Instance   | Size | Opt.   | Tree Size | Time | Instance    | Size | Opt.   | Tree Size | Time |
|------------|------|--------|-----------|------|-------------|------|--------|-----------|------|
| CETSP-6-0  | 7    | 25.492 | 21        | 0.03 | CETSP-10-0  | 11   | 33.676 | 47        | 0.06 |
| CETSP-6-1  | 7    | 30.070 | 7         | 0.01 | CETSP-10-1  | 11   | 33.975 | 22        | 0.03 |
| CETSP-6-2  | 7    | 23.583 | 7         | 0.01 | CETSP-10-2  | 11   | 39.391 | 45        | 0.06 |
| CETSP-6-3  | 7    | 21.242 | 7         | 0.01 | CETSP-10-3  | 11   | 25.712 | 21        | 0.03 |
| CETSP-6-4  | 7    | 32.872 | 11        | 0.02 | CETSP-10-4  | 11   | 29.385 | 47        | 0.06 |
| CETSP-6-5  | 7    | 18.328 | 33        | 0.04 | CETSP-10-5  | 11   | 30.549 | 33        | 0.04 |
| CETSP-6-6  | 7    | 24.583 | 11        | 0.01 | CETSP-10-6  | 11   | 29.905 | 52        | 0.06 |
| CETSP-6-7  | 7    | 31.874 | 7         | 0.01 | CETSP-10-7  | 11   | 31.081 | 16        | 0.02 |
| CETSP-6-8  | 7    | 21.429 | 7         | 0.01 | CETSP-10-8  | 11   | 30.131 | 21        | 0.03 |
| CETSP-6-9  | 7    | 24.651 | 3         | 0.01 | CETSP-10-9  | 11   | 26.385 | 72        | 0.10 |
| CETSP-6-10 | 7    | 31.547 | 3         | 0.01 | CETSP-10-10 | 11   | 29.958 | 27        | 0.04 |
| CETSP-6-11 | 7    | 27.599 | 7         | 0.01 | CETSP-10-11 | 11   | 25.754 | 46        | 0.06 |
| CETSP-6-12 | 7    | 28.757 | 21        | 0.02 | CETSP-10-12 | 11   | 31.008 | 52        | 0.06 |
| CETSP-6-13 | 7    | 22.859 | 11        | 0.02 | CETSP-10-13 | 11   | 31.673 | 33        | 0.04 |
| CETSP-6-14 | 7    | 24.410 | 7         | 0.01 | CETSP-10-14 | 11   | 29.243 | 16        | 0.02 |
| CETSP-6-15 | 7    | 30.915 | 21        | 0.02 | CETSP-10-15 | 11   | 29.146 | 21        | 0.02 |
| CETSP-6-16 | 7    | 19.410 | 3         | 0.00 | CETSP-10-16 | 11   | 26.944 | 33        | 0.04 |
| CETSP-6-17 | 7    | 19.719 | 3         | 0.01 | CETSP-10-17 | 11   | 30.583 | 47        | 0.06 |
| CETSP-6-18 | 7    | 24.642 | 21        | 0.02 | CETSP-10-18 | 11   | 35.006 | 18        | 0.03 |
| CETSP-6-19 | 7    | 30.289 | 1         | 0.01 | CETSP-10-19 | 11   | 35.341 | 33        | 0.04 |
| CETSP-6-20 | 7    | 30.112 | 21        | 0.02 | CETSP-10-20 | 11   | 29.807 | 16        | 0.03 |
| CETSP-6-21 | 7    | 27.666 | 33        | 0.04 | CETSP-10-21 | 11   | 36.794 | 21        | 0.03 |
| CETSP-6-22 | 7    | 24.699 | 11        | 0.02 | CETSP-10-22 | 11   | 33.030 | 55        | 0.07 |
| CETSP-6-23 | 7    | 26.323 | 21        | 0.02 | CETSP-10-23 | 11   | 30.539 | 47        | 0.06 |
| CETSP-6-24 | 7    | 29.251 | 11        | 0.01 | CETSP-10-24 | 11   | 33.796 | 63        | 0.08 |
| CETSP-6-25 | 7    | 27.683 | 3         | 0.01 | CETSP-10-25 | 11   | 31.857 | 33        | 0.04 |
| CETSP-6-26 | 7    | 25.540 | 21        | 0.02 | CETSP-10-26 | 11   | 32.308 | 78        | 0.11 |
| CETSP-6-27 | 7    | 25.691 | 32        | 0.04 | CETSP-10-27 | 11   | 27.130 | 58        | 0.08 |
| CETSP-6-28 | 7    | 32.081 | 11        | 0.02 | CETSP-10-28 | 11   | 32.835 | 25        | 0.03 |
| CETSP-6-29 | 7    | 36.183 | 21        | 0.02 | CETSP-10-29 | 11   | 31.368 | 33        | 0.04 |
| CETSP-8-0  | 9    | 28.952 | 16        | 0.02 | CETSP-12-0  | 13   | 34.781 | 40        | 0.04 |
| CETSP-8-1  | 9    | 31.040 | 40        | 0.05 | CETSP-12-1  | 13   | 31.290 | 15        | 0.02 |
| CETSP-8-2  | 9    | 21.442 | 11        | 0.02 | CETSP-12-2  | 13   | 41.043 | 63        | 0.08 |
| CETSP-8-3  | 9    | 32.872 | 11        | 0.02 | CETSP-12-3  | 13   | 29.392 | 47        | 0.06 |
| CETSP-8-4  | 9    | 25.130 | 22        | 0.03 | CETSP-12-4  | 13   | 29.861 | 33        | 0.04 |
| CETSP-8-5  | 9    | 29.458 | 7         | 0.01 | CETSP-12-5  | 13   | 32.559 | 120       | 0.18 |
| CETSP-8-6  | 9    | 22.370 | 21        | 0.03 | CETSP-12-6  | 13   | 34.125 | 7         | 0.01 |
| CETSP-8-7  | 9    | 24.883 | 16        | 0.02 | CETSP-12-7  | 13   | 31.965 | 47        | 0.06 |
| CETSP-8-8  | 9    | 29.024 | 16        | 0.02 | CETSP-12-8  | 13   | 34.148 | 80        | 0.11 |
| CETSP-8-9  | 9    | 34.773 | 21        | 0.03 | CETSP-12-9  | 13   | 28.670 | 63        | 0.08 |
| CETSP-8-10 | 9    | 26.870 | 7         | 0.01 | CETSP-12-10 | 13   | 36.543 | 70        | 0.09 |
| CETSP-8-11 | 9    | 25.265 | 47        | 0.06 | CETSP-12-11 | 13   | 32.700 | 39        | 0.05 |
| CETSP-8-12 | 9    | 29.043 | 21        | 0.02 | CETSP-12-12 | 13   | 30.844 | 37        | 0.05 |
| CETSP-8-13 | 9    | 25.410 | 33        | 0.04 | CETSP-12-13 | 13   | 33.012 | 67        | 0.09 |
| CETSP-8-14 | 9    | 30.538 | 69        | 0.08 | CETSP-12-14 | 13   | 30.262 | 33        | 0.04 |
| CETSP-8-15 | 9    | 29.667 | 33        | 0.04 | CETSP-12-15 | 13   | 37.461 | 33        | 0.04 |
| CETSP-8-16 | 9    | 31.628 | 16        | 0.02 | CETSP-12-16 | 13   | 34.406 | 33        | 0.04 |
| CETSP-8-17 | 9    | 27.788 | 11        | 0.02 | CETSP-12-17 | 13   | 32.065 | 33        | 0.04 |
| CETSP-8-18 | 9    | 28.266 | 33        | 0.04 | CETSP-12-18 | 13   | 35.911 | 33        | 0.04 |
| CETSP-8-19 | 9    | 30.907 | 21        | 0.03 | CETSP-12-19 | 13   | 34.633 | 63        | 0.08 |
| CETSP-8-20 | 9    | 26.556 | 21        | 0.03 | CETSP-12-20 | 13   | 29.612 | 63        | 0.08 |
| CETSP-8-21 | 9    | 29.067 | 33        | 0.04 | CETSP-12-21 | 13   | 34.539 | 46        | 0.06 |
| CETSP-8-22 | 9    | 37.842 | 12        | 0.02 | CETSP-12-22 | 13   | 32.308 | 78        | 0.11 |
| CETSP-8-23 | 9    | 28.988 | 27        | 0.03 | CETSP-12-23 | 13   | 29.230 | 47        | 0.06 |
| CETSP-8-24 | 9    | 29.801 | 7         | 0.01 | CETSP-12-24 | 13   | 31.748 | 81        | 0.11 |
| CETSP-8-25 | 9    | 34.837 | 46        | 0.06 | CETSP-12-25 | 13   | 34.127 | 62        | 0.08 |
| CETSP-8-26 | 9    | 32.499 | 33        | 0.04 | CETSP-12-26 | 13   | 29.896 | 32        | 0.04 |
| CETSP-8-27 | 9    | 31.435 | 26        | 0.03 | CETSP-12-27 | 13   | 30.937 | 60        | 0.08 |
| CETSP-8-28 | 9    | 26.912 | 16        | 0.02 | CETSP-12-28 | 13   | 31.753 | 54        | 0.07 |
| CETSP-8-29 | 9    | 31.118 | 7         | 0.01 | CETSP-12-29 | 13   | 32.269 | 47        | 0.06 |

**Table 6** Results for  $r = 1.0$  (Continued)

| Instance    | Size | Opt.   | Tree Size | Time | Instance    | Size | Opt.   | Tree Size | Time |
|-------------|------|--------|-----------|------|-------------|------|--------|-----------|------|
| CETSP-14-0  | 15   | 34.891 | 63        | 0.09 | CETSP-18-0  | 19   | 35.121 | 63        | 0.09 |
| CETSP-14-1  | 15   | 34.924 | 33        | 0.04 | CETSP-18-1  | 19   | 39.579 | 91        | 0.14 |
| CETSP-14-2  | 15   | 32.633 | 47        | 0.06 | CETSP-18-2  | 19   | 32.945 | 101       | 0.15 |
| CETSP-14-3  | 15   | 31.126 | 47        | 0.06 | CETSP-18-3  | 19   | 35.849 | 170       | 0.24 |
| CETSP-14-4  | 15   | 32.846 | 87        | 0.12 | CETSP-18-4  | 19   | 37.675 | 47        | 0.06 |
| CETSP-14-5  | 15   | 31.186 | 47        | 0.06 | CETSP-18-5  | 19   | 34.073 | 86        | 0.12 |
| CETSP-14-6  | 15   | 30.177 | 78        | 0.11 | CETSP-18-6  | 19   | 31.038 | 300       | 0.47 |
| CETSP-14-7  | 15   | 34.487 | 79        | 0.11 | CETSP-18-7  | 19   | 32.758 | 47        | 0.07 |
| CETSP-14-8  | 15   | 29.768 | 112       | 0.16 | CETSP-18-8  | 19   | 30.074 | 63        | 0.09 |
| CETSP-14-9  | 15   | 33.177 | 21        | 0.03 | CETSP-18-9  | 19   | 31.082 | 54        | 0.07 |
| CETSP-14-10 | 15   | 30.981 | 72        | 0.10 | CETSP-18-10 | 19   | 36.530 | 98        | 0.15 |
| CETSP-14-11 | 15   | 32.312 | 81        | 0.12 | CETSP-18-11 | 19   | 40.579 | 146       | 0.22 |
| CETSP-14-12 | 15   | 30.852 | 63        | 0.08 | CETSP-18-12 | 19   | 36.199 | 99        | 0.15 |
| CETSP-14-13 | 15   | 38.265 | 46        | 0.06 | CETSP-18-13 | 19   | 35.674 | 191       | 0.28 |
| CETSP-14-14 | 15   | 35.034 | 81        | 0.11 | CETSP-18-14 | 19   | 35.797 | 189       | 0.29 |
| CETSP-14-15 | 15   | 35.122 | 81        | 0.12 | CETSP-18-15 | 19   | 34.262 | 108       | 0.16 |
| CETSP-14-16 | 15   | 38.485 | 64        | 0.09 | CETSP-18-16 | 19   | 36.065 | 215       | 0.34 |
| CETSP-14-17 | 15   | 29.067 | 158       | 0.24 | CETSP-18-17 | 19   | 35.929 | 131       | 0.21 |
| CETSP-14-18 | 15   | 33.622 | 80        | 0.11 | CETSP-18-18 | 19   | 38.803 | 47        | 0.07 |
| CETSP-14-19 | 15   | 32.327 | 98        | 0.14 | CETSP-18-19 | 19   | 36.045 | 87        | 0.13 |
| CETSP-14-20 | 15   | 29.732 | 72        | 0.10 | CETSP-18-20 | 19   | 36.313 | 96        | 0.14 |
| CETSP-14-21 | 15   | 32.089 | 80        | 0.12 | CETSP-18-21 | 19   | 29.907 | 81        | 0.12 |
| CETSP-14-22 | 15   | 35.956 | 91        | 0.13 | CETSP-18-22 | 19   | 33.977 | 172       | 0.24 |
| CETSP-14-23 | 15   | 33.998 | 59        | 0.08 | CETSP-18-23 | 19   | 33.849 | 101       | 0.15 |
| CETSP-14-24 | 15   | 34.632 | 54        | 0.08 | CETSP-18-24 | 19   | 37.888 | 200       | 0.34 |
| CETSP-14-25 | 15   | 32.228 | 47        | 0.06 | CETSP-18-25 | 19   | 37.034 | 91        | 0.14 |
| CETSP-14-26 | 15   | 36.858 | 84        | 0.11 | CETSP-18-26 | 19   | 39.959 | 33        | 0.05 |
| CETSP-14-27 | 15   | 31.327 | 47        | 0.07 | CETSP-18-27 | 19   | 35.011 | 63        | 0.09 |
| CETSP-14-28 | 15   | 32.964 | 115       | 0.16 | CETSP-18-28 | 19   | 32.906 | 135       | 0.22 |
| CETSP-14-29 | 15   | 30.086 | 47        | 0.07 | CETSP-18-29 | 19   | 36.725 | 200       | 0.30 |
| CETSP-16-0  | 17   | 34.891 | 63        | 0.09 | CETSP-20-0  | 21   | 35.182 | 80        | 0.12 |
| CETSP-16-1  | 17   | 39.564 | 63        | 0.09 | CETSP-20-1  | 21   | 39.549 | 81        | 0.12 |
| CETSP-16-2  | 17   | 30.317 | 54        | 0.08 | CETSP-20-2  | 21   | 31.125 | 101       | 0.16 |
| CETSP-16-3  | 17   | 36.763 | 109       | 0.16 | CETSP-20-3  | 21   | 41.023 | 225       | 0.36 |
| CETSP-16-4  | 17   | 32.754 | 61        | 0.09 | CETSP-20-4  | 21   | 33.327 | 147       | 0.24 |
| CETSP-16-5  | 17   | 32.136 | 101       | 0.14 | CETSP-20-5  | 21   | 36.919 | 184       | 0.32 |
| CETSP-16-6  | 17   | 35.219 | 212       | 0.31 | CETSP-20-6  | 21   | 37.616 | 185       | 0.29 |
| CETSP-16-7  | 17   | 30.988 | 208       | 0.36 | CETSP-20-7  | 21   | 35.581 | 91        | 0.13 |
| CETSP-16-8  | 17   | 32.571 | 47        | 0.06 | CETSP-20-8  | 21   | 33.817 | 103       | 0.16 |
| CETSP-16-9  | 17   | 30.038 | 33        | 0.05 | CETSP-20-9  | 21   | 37.473 | 79        | 0.11 |
| CETSP-16-10 | 17   | 31.029 | 63        | 0.09 | CETSP-20-10 | 21   | 35.743 | 192       | 0.33 |
| CETSP-16-11 | 17   | 34.141 | 79        | 0.12 | CETSP-20-11 | 21   | 38.366 | 137       | 0.22 |
| CETSP-16-12 | 17   | 43.595 | 101       | 0.16 | CETSP-20-12 | 21   | 34.488 | 321       | 0.52 |
| CETSP-16-13 | 17   | 37.177 | 63        | 0.09 | CETSP-20-13 | 21   | 34.494 | 157       | 0.26 |
| CETSP-16-14 | 17   | 38.259 | 73        | 0.12 | CETSP-20-14 | 21   | 34.645 | 135       | 0.20 |
| CETSP-16-15 | 17   | 32.576 | 169       | 0.27 | CETSP-20-15 | 21   | 34.790 | 163       | 0.22 |
| CETSP-16-16 | 17   | 32.729 | 118       | 0.18 | CETSP-20-16 | 21   | 37.822 | 189       | 0.30 |
| CETSP-16-17 | 17   | 30.857 | 101       | 0.17 | CETSP-20-17 | 21   | 36.094 | 109       | 0.16 |
| CETSP-16-18 | 17   | 36.428 | 180       | 0.27 | CETSP-20-18 | 21   | 36.882 | 146       | 0.24 |
| CETSP-16-19 | 17   | 35.113 | 95        | 0.14 | CETSP-20-19 | 21   | 32.868 | 197       | 0.31 |
| CETSP-16-20 | 17   | 38.367 | 101       | 0.16 | CETSP-20-20 | 21   | 38.084 | 276       | 0.44 |
| CETSP-16-21 | 17   | 34.724 | 55        | 0.08 | CETSP-20-21 | 21   | 35.649 | 166       | 0.28 |
| CETSP-16-22 | 17   | 33.343 | 46        | 0.08 | CETSP-20-22 | 21   | 36.922 | 154       | 0.25 |
| CETSP-16-23 | 17   | 36.513 | 101       | 0.15 | CETSP-20-23 | 21   | 38.927 | 254       | 0.45 |
| CETSP-16-24 | 17   | 29.977 | 118       | 0.18 | CETSP-20-24 | 21   | 40.088 | 97        | 0.15 |
| CETSP-16-25 | 17   | 32.967 | 63        | 0.09 | CETSP-20-25 | 21   | 35.367 | 250       | 0.42 |
| CETSP-16-26 | 17   | 34.358 | 130       | 0.20 | CETSP-20-26 | 21   | 38.045 | 139       | 0.21 |
| CETSP-16-27 | 17   | 36.953 | 112       | 0.17 | CETSP-20-27 | 21   | 36.404 | 356       | 0.62 |
| CETSP-16-28 | 17   | 36.534 | 100       | 0.14 | CETSP-20-28 | 21   | 38.698 | 86        | 0.13 |
| CETSP-16-29 | 17   | 36.786 | 21        | 0.03 | CETSP-20-29 | 21   | 34.393 | 86        | 0.12 |

## References

- Behdani, B., J. C. Smith. 2014. An Integer-Programming-Based Approach to the Close-Enough Traveling Salesman Problem. *INFORMS J. Comput.* **26**(3) 415–432.
